# Supplementary material
Source: PubMed Central journal article supplement (PMC10799843)
Supplement: NIHMS1957564-supplement-Supplement_Info.pdf [file NIHMS1957564-supplement-Supplement_Info.pdf]

## Supplemental Information

**Figure S1.** *In vivo* fluorescence images of intratibial osteosarcoma tumor-bearing NSG mice at  $t=0$  (pre-injection), 0.1, 6, 12, 24, 48, 72, 96, 120, 144, and 168 hr after tail-vein injection of Cy5.5-labeled HPMA-CHP. Mice were implanted with Saos-2 cells in the right proximal tibia and grown for 4 weeks prior to administration of polymer conjugate or peptide. Yellow dashed oval indicates location of osteosarcoma tumor. Experiment was performed with  $N=6$ , with five animals pictured here and the sixth animal in Figure S4.

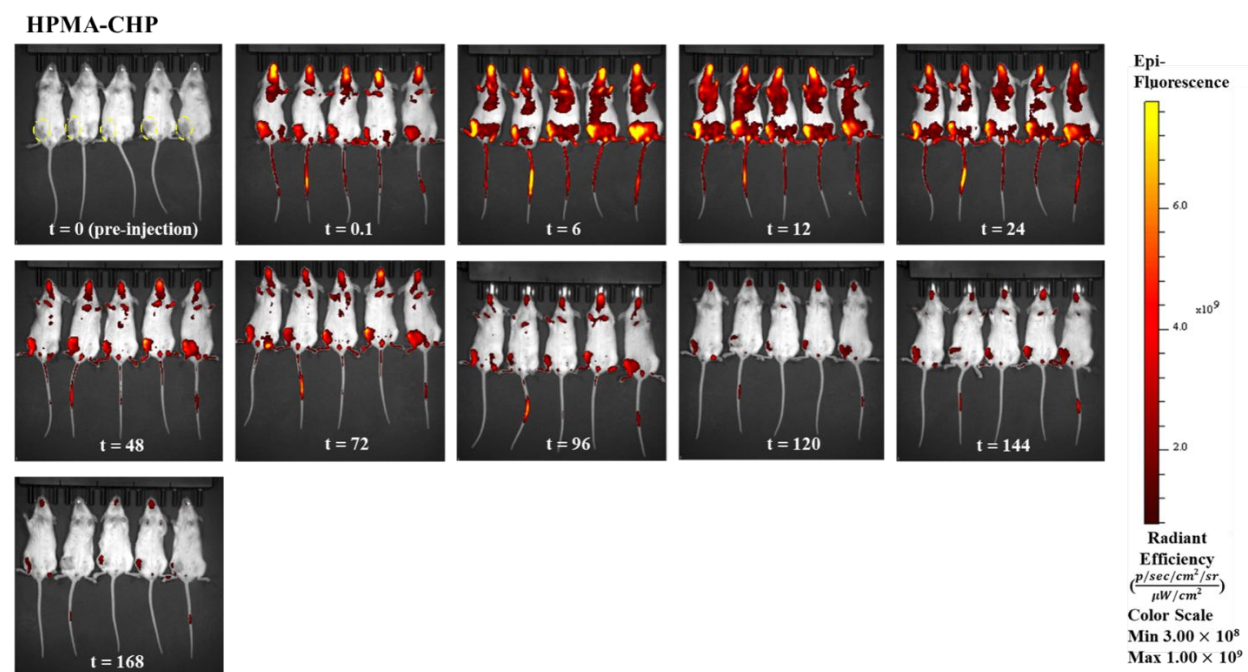

**Figure S2.** *In vivo* fluorescence images of intratibial osteosarcoma tumor-bearing NSG mice at  $t=0$  (pre-injection), 0.1, 6, 12, 24, 48, 72, 96, 120, 144, and 168 hr after tail-vein injection of Cy5.5-labeled HPMAs-CHP. Mice were implanted with Saos-2 cells in the right proximal tibia and grown for 4 weeks prior to administration of polymer conjugate or peptide. Yellow dashed oval indicates location of osteosarcoma tumor. Experiment was performed with N=6, with five animals pictured here and the sixth animal in Figure S4.

**HPMA-<sup>S</sup>CHP**

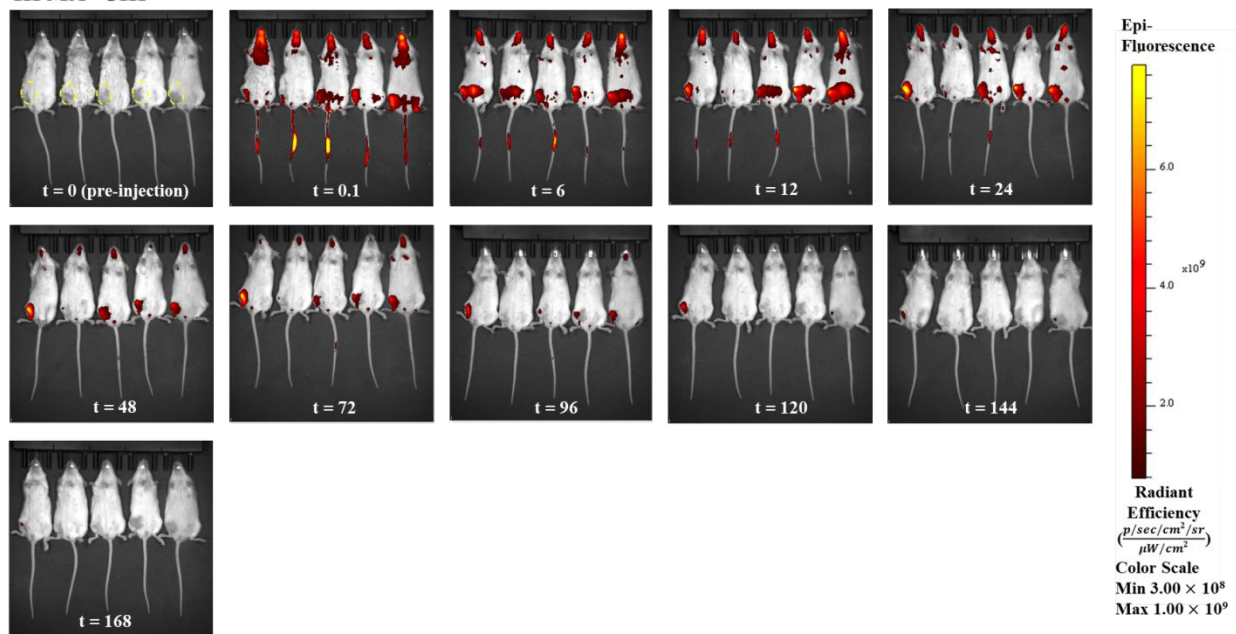

**Figure S3.** *In vivo* fluorescence images of intratibial osteosarcoma tumor-bearing NSG mice at  $t=0$  (pre-injection), 0.1, 6, 12, 24, 48, 72, 96, 120, 144, and 168 hr after tail-vein injection of Cy5.5-labeled CHP. Mice were implanted with Saos-2 cells in the right proximal tibia and grown for 4 weeks prior to administration of polymer conjugate or peptide. Yellow dashed oval indicates location of osteosarcoma tumor. Experiment was performed with N=6, with five animals pictured here and the sixth animal in Figure S4.

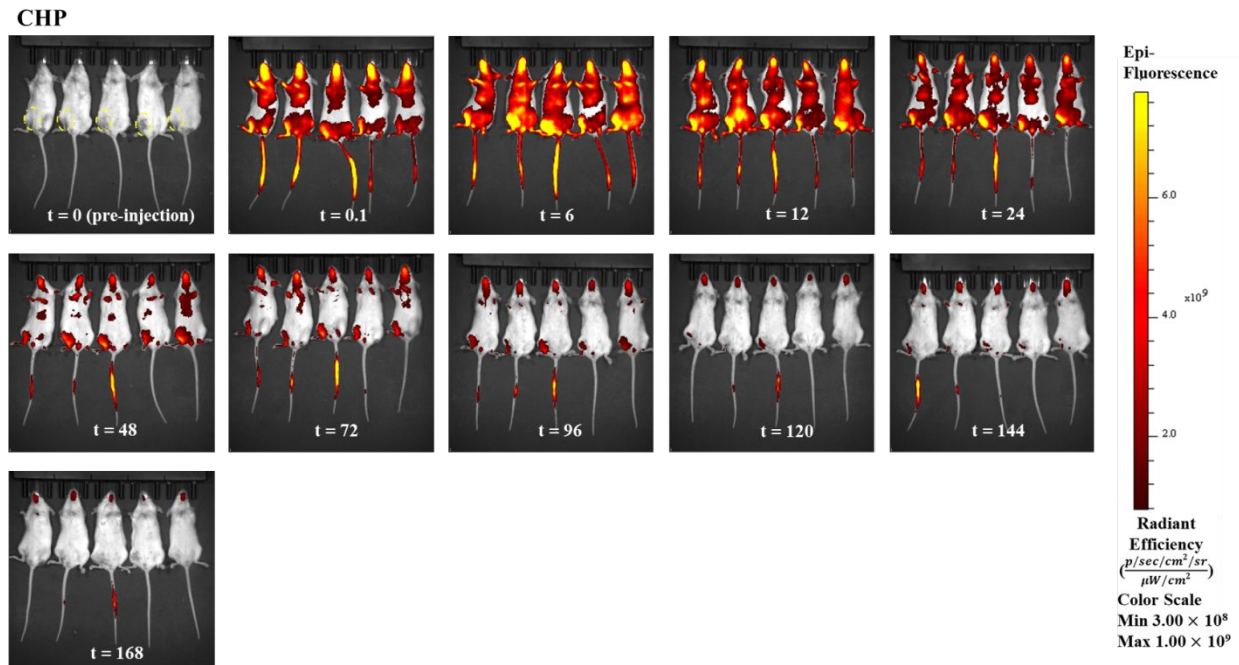

**Figure S4.** *In vivo* fluorescence images of intratibial osteosarcoma tumor-bearing NSG mice at  $t=0$  (pre-injection), 0.1, 6, 12, 24, 48, 72, 96, 120, 144, and 168 hr after tail-vein injection of Cy5.5-labeled HPMa-CHP (1), HPMa-<sup>S</sup>CHP (2), and CHP (3). Mice were implanted with Saos-2 cells in the right proximal tibia and grown for 4 weeks prior to administration of polymer conjugate or peptide. Yellow dashed oval indicates location of osteosarcoma tumor. Experiment was performed with N=6, with one animal from each group pictured here, and the other five animals pictured in Figures S1-S3.

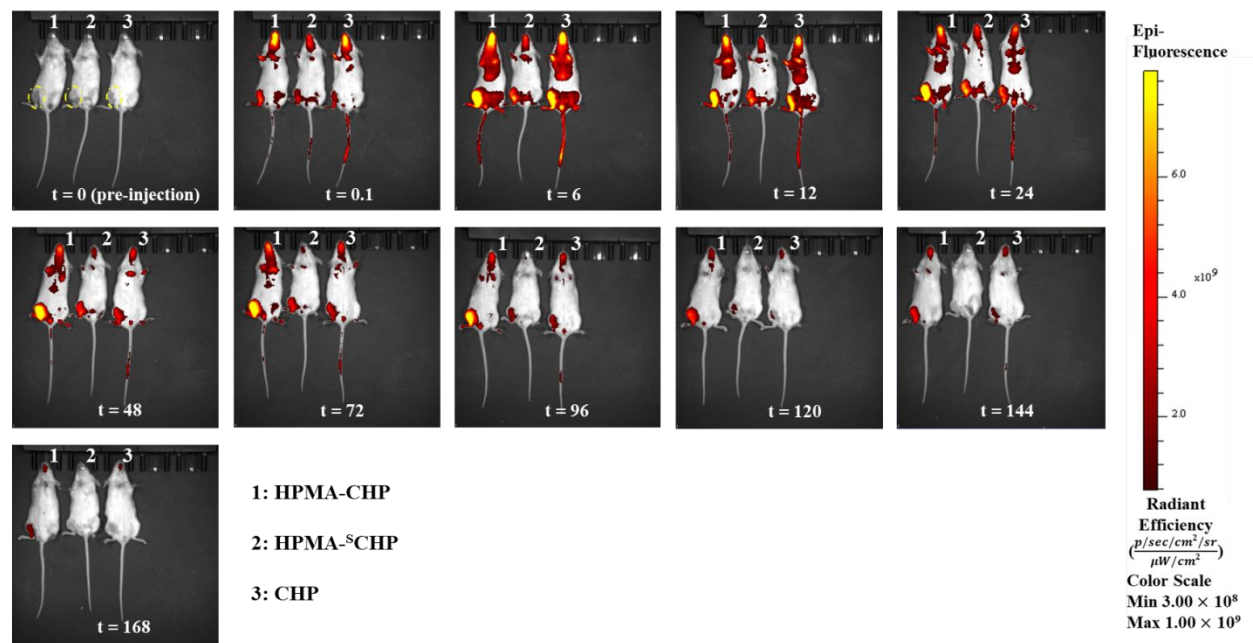

**Figure S5.** Fluorescence images of harvested tumor-bearing leg (1), heart (2), lungs (3), liver (4), kidneys (5), spleen (6), and stomach and intestines (7) from mice bearing osteosarcoma tumors in the right proximal tibia, at 168 hrs after tail-vein injection of Cy5.5-labeled HPMA-CHP. (N=6).

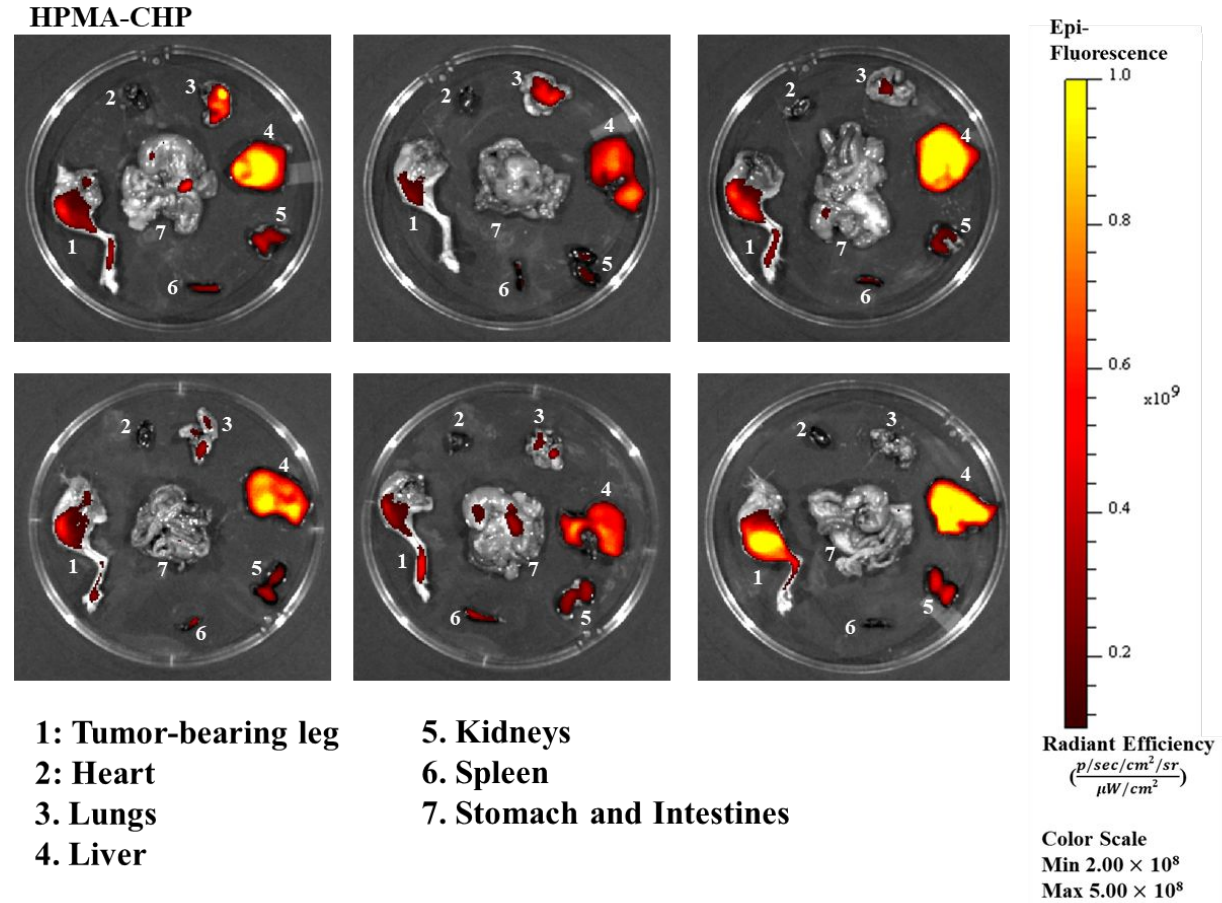

**Figure S6.** Fluorescence images of harvested tumor-bearing leg (1), heart (2), lungs (3), liver (4), kidneys (5), spleen (6), and stomach and intestines (7) from mice bearing osteosarcoma tumors in the right proximal tibia, at 168 hrs after tail-vein injection of Cy5.5-labeled HPMA-<sup>S</sup>CHP. (N=6).

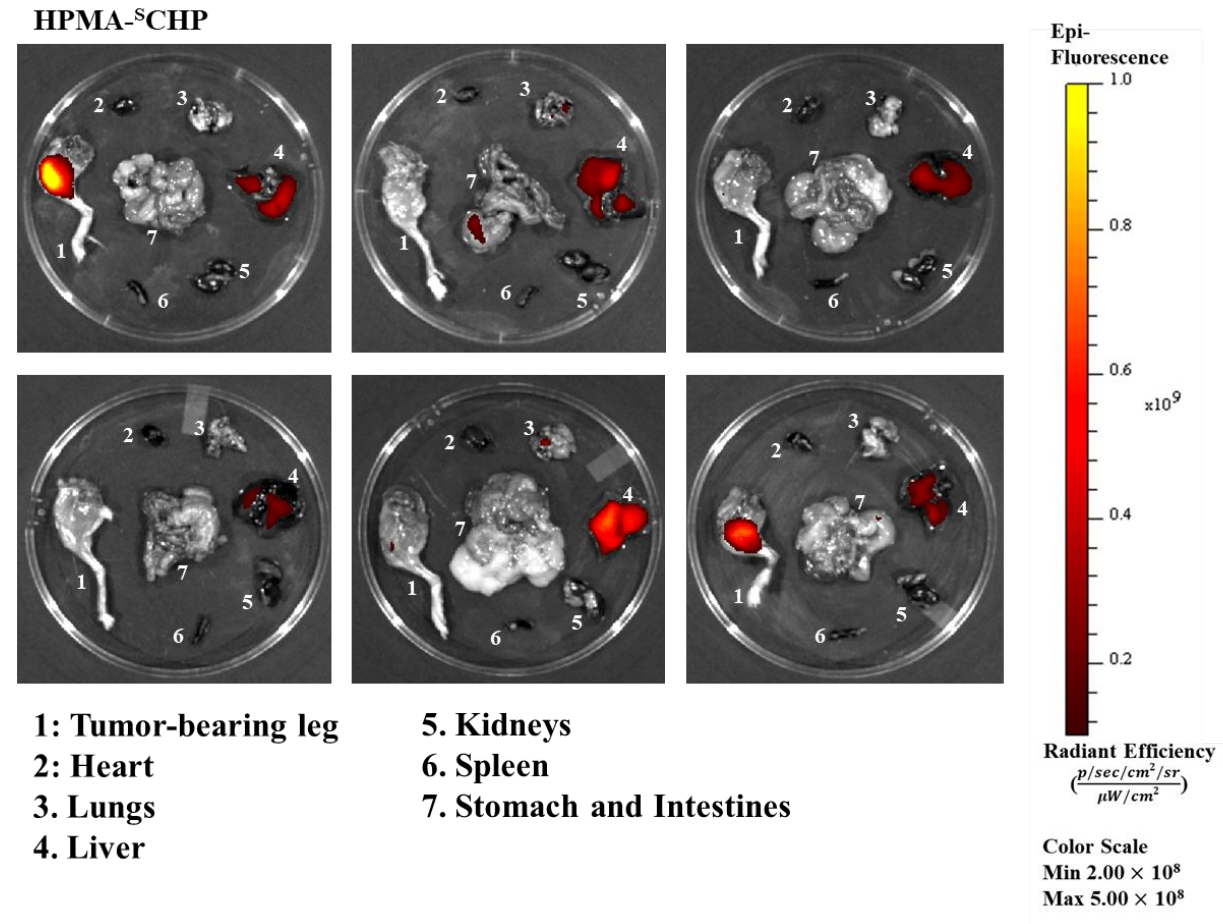

**Figure S7.** Fluorescence images of harvested tumor-bearing leg (1), heart (2), lungs (3), liver (4), kidneys (5), spleen (6), and stomach and intestines (7) from mice bearing osteosarcoma tumors in the right proximal tibia, at 168 hrs after tail-vein injection of Cy5.5-labeled CHP. (N=6).

**CHP**

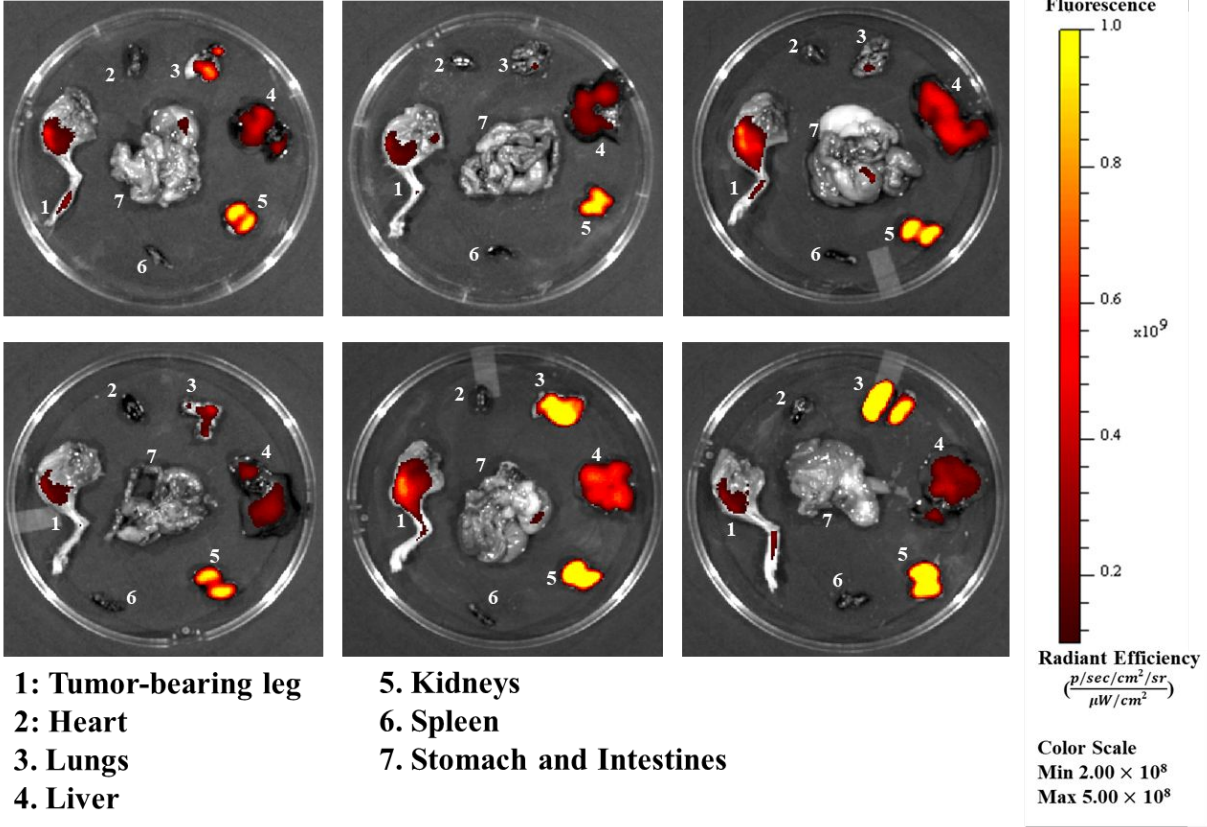

**Table S1.** Pearson correlation coefficient  $r$  values for accumulation at 168 hr ( $S_{168}$ ) and maximum accumulation ( $S_{max}$ ) values of HPMa-CHP, HPMa-<sup>S</sup>CHP, and CHP with respect to each bone morphometric parameter. Parameters with a Pearson  $r$  value with absolute value greater than or equal to 0.7 are highlighted in yellow.

|                                            | Pearson $r$    |           |                              |           |            |           |
|--------------------------------------------|----------------|-----------|------------------------------|-----------|------------|-----------|
|                                            | HPMA-CHP (n=6) |           | HPMA- <sup>S</sup> CHP (n=5) |           | CHP (n=6)  |           |
|                                            | $S_{168}$      | $S_{max}$ | $S_{168}$                    | $S_{max}$ | $S_{168}$  | $S_{max}$ |
| Volume of total bone                       | -0.3923        | -0.6804   | 0.7871                       | 0.671     | 0.4037     | -0.3692   |
| Volume of cortex                           | -0.4141        | -0.7189   | 0.7976                       | 0.6922    | 0.4754     | -0.3111   |
| Volume of intra-trabecular region          | -0.24          | -0.2062   | 0.3245                       | 0.6696    | 0.3111     | -0.1285   |
| Volume of trabecular bone                  | 0.1938         | 0.3112    | 0.6041                       | 0.3749    | -0.4575    | -0.6859   |
| Volume of total trabecular tissue          | -0.2261        | -0.1698   | 0.4861                       | 0.7205    | 0.2097     | -0.2433   |
| Volume of whole tissue                     | -0.4129        | -0.6177   | 0.7947                       | 0.7675    | 0.4802     | -0.3657   |
| Total volume of trabecular tissue          | -0.406         | -0.613    | 0.7942                       | 0.7664    | 0.4752     | -0.3655   |
| Bone volume of trabecular tissue           | -0.3923        | -0.6804   | 0.7871                       | 0.671     | 0.4037     | -0.3692   |
| Bone surface area of trabecular tissue     | -0.7268        | -0.7096   | 0.7618                       | 0.8189    | 0.03658    | -0.6661   |
| Bone volume fraction of trabecular tissue  | -0.04029       | -0.2892   | 0.5884                       | 0.2841    | -0.0007015 | -0.1353   |
| Bone surface density of trabecular tissue  | 0.006045       | 0.3614    | -0.1909                      | 0.1318    | -0.7932    | -0.2273   |
| Specific bone surface of trabecular tissue | 0.02375        | 0.3857    | -0.5734                      | -0.1746   | -0.4753    | -0.06563  |
| Cortical porosity                          | 0.7704         | 0.6553    | 0.8166                       | 0.7423    | -0.1723    | -0.1056   |
| Pore number of cortex                      | -0.3459        | -0.01768  | 0.7805                       | 0.7647    | -0.2758    | -0.8352   |
| Total pore volume of cortex                | 0.5889         | 0.2791    | 0.8057                       | 0.7111    | 0.1064     | -0.2187   |
| Average pore volume of cortex              | 0.7374         | 0.2145    | -0.449                       | -0.6687   | 0.4582     | 0.854     |
| Pore density of cortex                     | 0.01089        | 0.5116    | 0.7735                       | 0.8001    | -0.541     | -0.818    |
